# Supplementary material for: Hierarchical porosityvialayer-tunnel conversion of macroporous δ-MnO2nanosheet assemblies
Source: Royal Society of Chemistry journal article supplement (doi:10.1039/c9ra08432k), 2020-01-01
Supplement: c9ra08432k1.pdf [file c9ra08432k1.pdf]

# Hierarchical porosity via layer-tunnel conversion of macroporous $\delta$ -MnO<sub>2</sub> nanosheet assemblies

Peter C. Metz,<sup>a‡</sup> Alec C. Ladonis,<sup>‡</sup> Peng Gao,<sup>b</sup> Trevyn Hey, and Scott T. Misture\*

---

*NYS College of Ceramics, Alfred University, Alfred, NY 14802, USA.*

\* Email: [misture@alfred.edu](mailto:misture@alfred.edu)

‡ These authors contributed equally to this work.

*Present address:*

<sup>a</sup> *Spallation Neutron Source, Oak Ridge National Laboratory, Oak Ridge, TN 37830, USA.*

<sup>b</sup> *College of Materials Science and Engineering, Hunan University, Chengsha, Hunan Province 410082, China.*

## THERMOGRAVIMETIC ANALYSIS

Figure S1 shows the typical dehydration behavior of a  $\delta$ -MnO<sub>2</sub> nanosheet floccule powder, with primary dehydration due to loss of physisorbed water by 100 °C, and removal of structural water by ~220 °C. Continued mass loss is associated with the phase transformations to  $\alpha$ -MnO<sub>2</sub> and  $\alpha$ -Mn<sub>2</sub>O<sub>3</sub> at higher temperature.

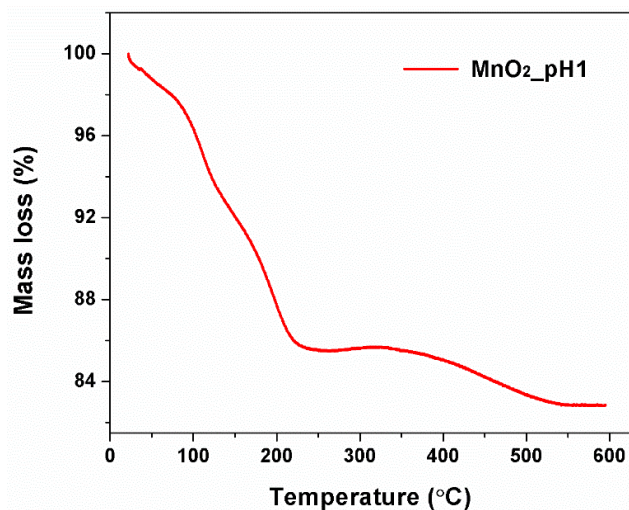

**Figure S1.** Mass loss signal of a flocculated MnO<sub>2</sub> nanosheets powder equilibrated at pH 1 in HCl.

## PARENT VS. ION-EXCHANGED POWDER XRD

Laboratory X-ray powder diffraction (PXRD) data of parent  $K_xMnO_2$  and ion exchanged powder collected in Bragg-Brentano (reflection) geometry show strong 00l reflections, in part due to plate-like powders and preferred orientation, and in part due to the diffraction peak structure factors. Upon protonation, the d-spacing of the 001 basal reflection increases by  $0.28\text{\AA}$ , indicating an increased repulsion of the partially negatively charged  $Mn(III, IV)O_2$  sheets due to removal of the charge balancing  $K^+$  ions in the interlayer gallery.

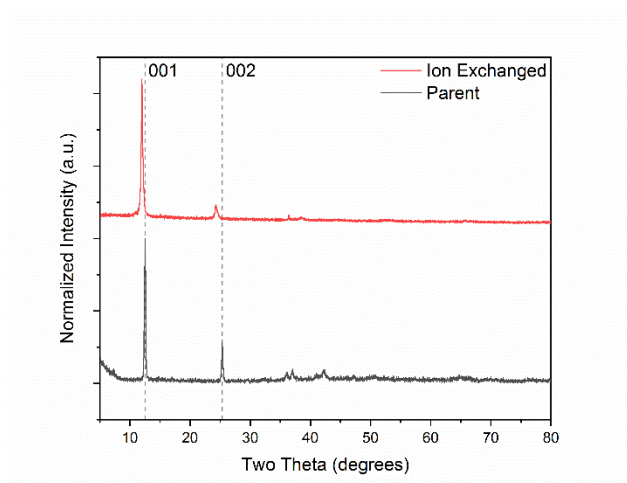

**Figure S2.** Typical laboratory PXRD data for parent potassium birnessite ( $K_xMnO_2$ ) and the protonated derivative  $H_xMnO_2$ .

## NITROGEN ADSORPTION ISOTHERMS

Specific surface area (SSA) and pore characteristics were investigated using isothermal nitrogen adsorption studies. Data were measured using a Micromeritics TriStar II. Due to the metastable nature of the flocculated MnO<sub>2</sub> nanosheet material, the room temperature sample (RT) was degassed for 3 days at ambient temperature under vacuum. The RT degassed sample was heated to 300 °C directly thereafter and returned to the BET instrument for data acquisition.

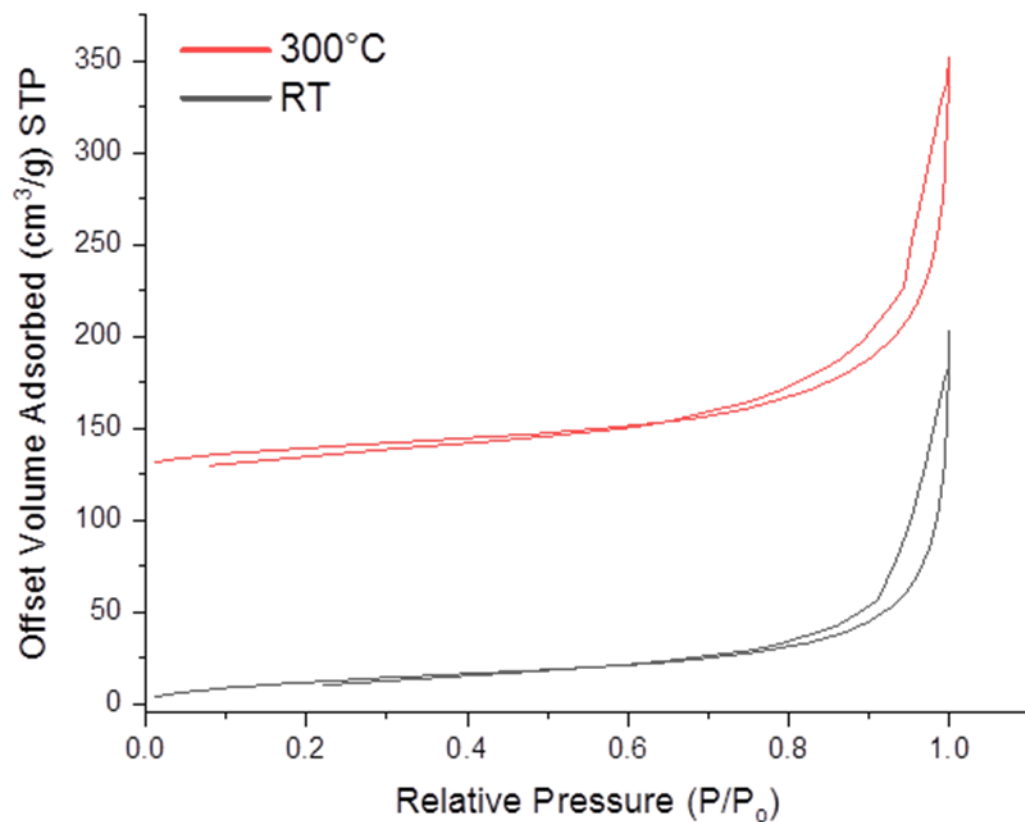

**Figure S3.** Nitrogen adsorption isotherms for  $\delta$ -MnO<sub>2</sub> floccs dried at room temperature (black) and heat-treated to 300 °C (offset, red). SSA is  $\sim 80 \text{ m}^2 \cdot \text{g}^{-1}$  in both samples.

## MODEL-FREE FITTING OF THE $\delta$ -MnO<sub>2</sub> LOCAL STRUCTURE

Estimates of in-plane ( $\text{Mn}^{\text{I}}$ ) and out-of-plane ( $\text{Mn}^{\text{II}}$ ) manganese occupancies were obtained by comparing peak areas in the parent  $\text{K}_x\text{MnO}_2$  (nominally ppm defect concentrations) and derived nanosheet ensembles. Peak areas were extracted by fitting Gaussians to the low- $r$  region of the atomic PDF. The details of the fitting process are presented in the main text. The fits are plotted below for inspection of fit quality.

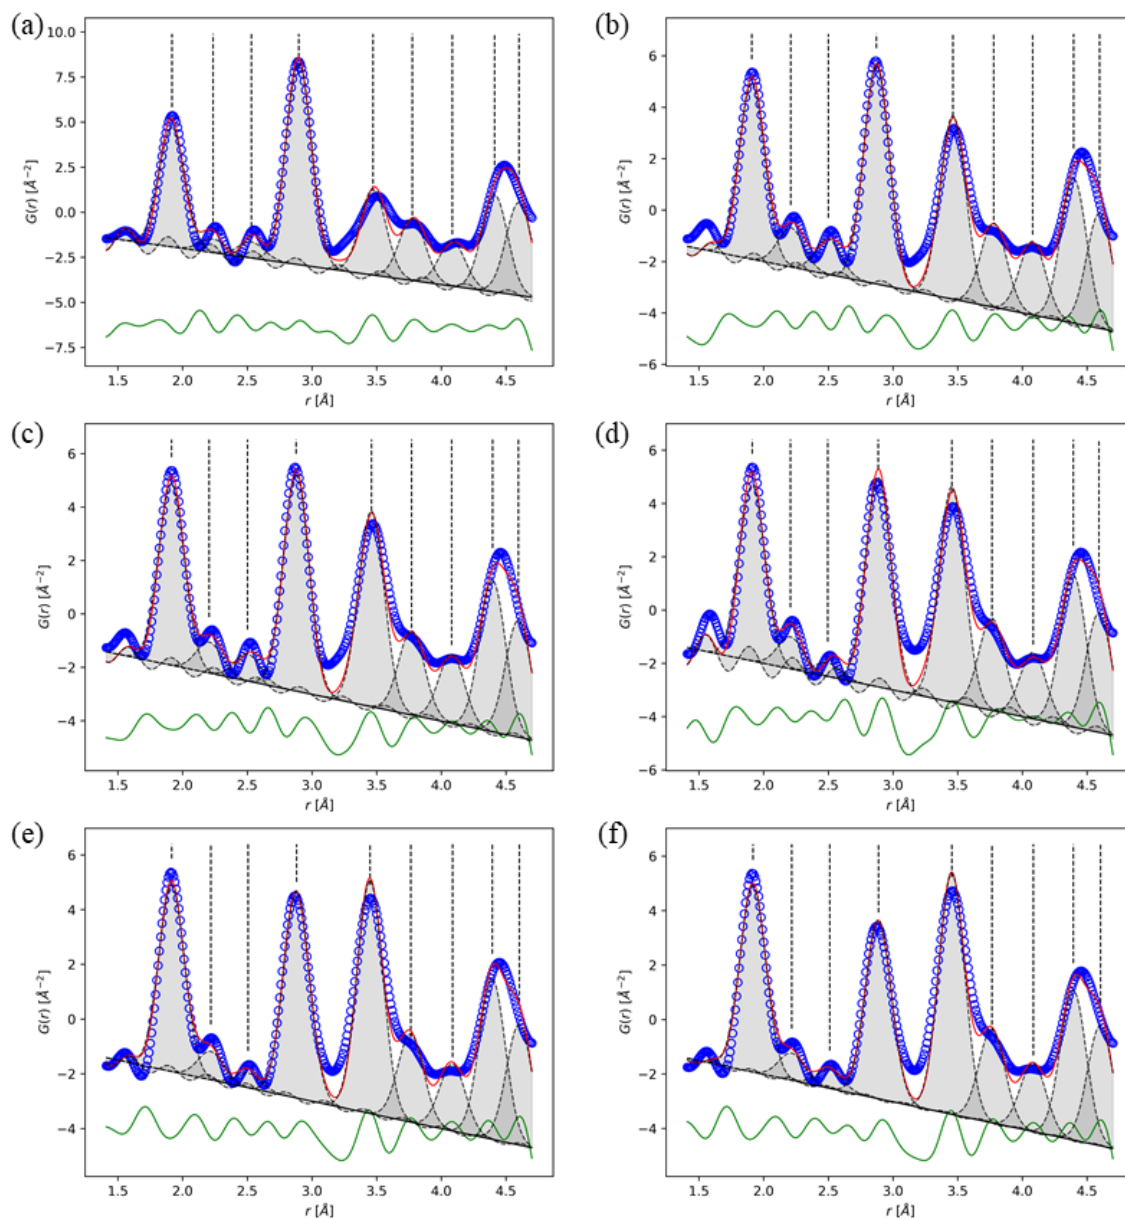

**Figure S4.** PDF data for parent  $\text{K}_x\text{MnO}_2$  (a), and  $\delta$ -MnO<sub>2</sub> floccs heated to 60 (b), 100 (c), 200 (d), 300 (e), and 400 (f) °C.

**Table S1.** Occupancy parameters extracted from the PDF data by model-free fitting.

|        | [Mn] | ±    | [Mn <sup>II</sup> ] | ±    | Sum  | ±    |
|--------|------|------|---------------------|------|------|------|
| Parent | 1.0  | -    | 0.0                 | -    | 1.0  | -    |
| 60 °C  | 0.74 | 0.04 | 0.19                | 0.04 | 0.93 | 0.07 |
| 100 °C | 0.72 | 0.04 | 0.21                | 0.04 | 0.93 | 0.07 |
| 200 °C | 0.71 | 0.04 | 0.28                | 0.04 | 0.99 | 0.08 |
| 300 °C | 0.67 | 0.04 | 0.32                | 0.04 | 0.99 | 0.07 |
| 400 °C | 0.58 | 0.04 | 0.35                | 0.05 | 0.93 | 0.07 |

## CV DATA

Cyclic voltammograms were collected at scan rates of 2, 5, 10, 20, 50, and 100  $\text{mV}\cdot\text{s}^{-1}$  for  $\delta\text{-MnO}_2$  floccule electrodes (details of preparation in main text) in aqueous 1 M  $\text{Na}_2\text{SO}_4$ . Error bars on the measured current are the standard deviation of the 4 sample electrodes.

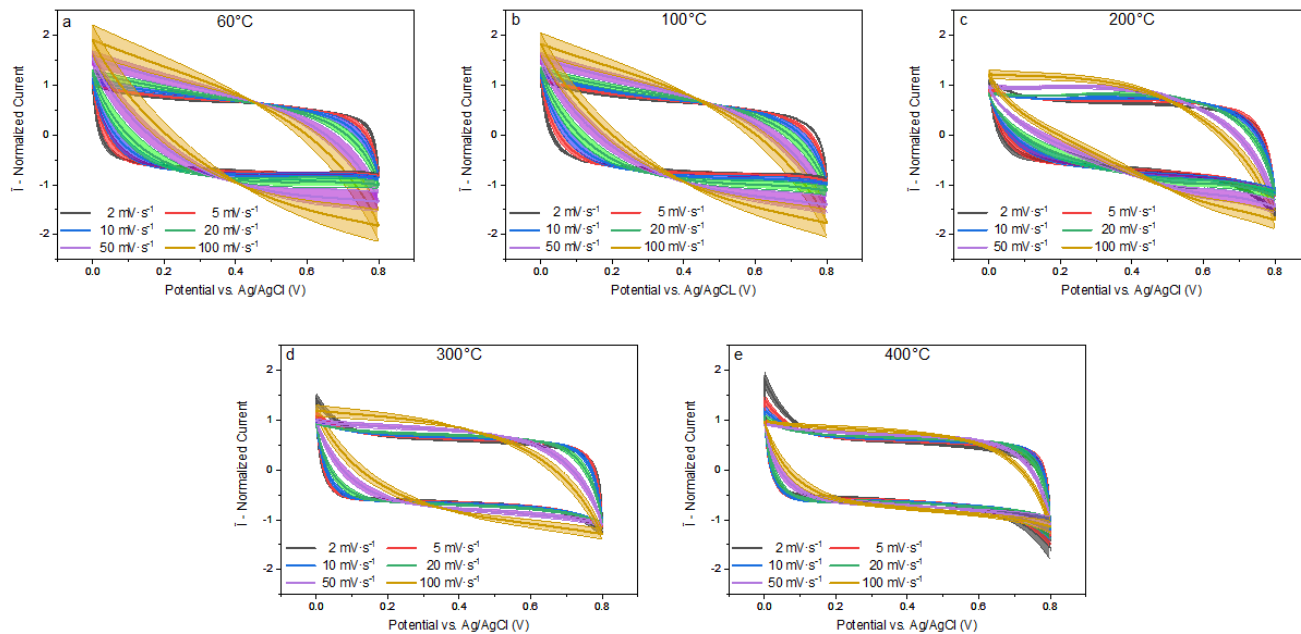

**Figure S5.** Cyclic voltammograms analyzed in the main text (a-e).

## LOGARITHMIC REGRESSION OF B-VALUE

In order to assess the relative pseudocapacitive and capacitive characteristics, the so-called b-values were extracted by logarithmic regression, where the capacitive current is assumed to follow a power-law behavior

$$i = a v^b. \quad (\text{S1})$$

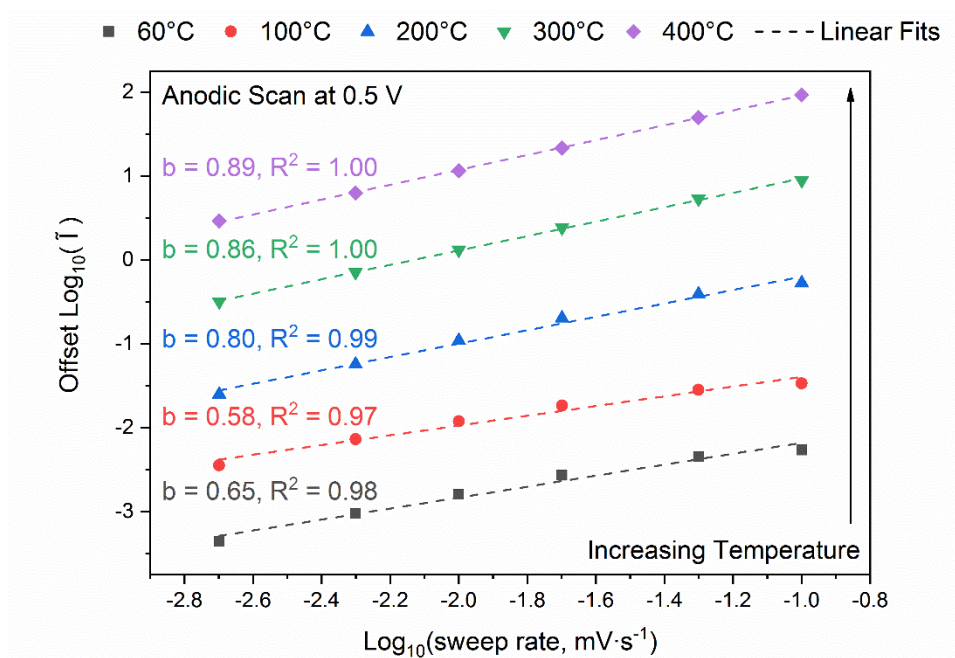

**Figure S6.** Linear regression determination of the b-value for the anodic scan at 0.5V. Each regression represents a single electrode heat treated at the corresponding temperature.
